# Supplementary material
Source: Springer Nature journal article supplement (https://www.springermedizin.de/resource/supplementary/12880_2013_190_MOESM2_ESM.pdf/9450190)

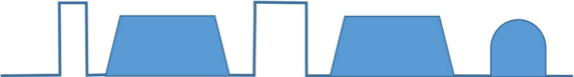

90°

G1

180°

G2

echo

Supplement: MOESM2 [file 9450190]
